# Supplementary material for: Comparing a 7-day diary vs. 24 h-recall for estimating fluid consumption in overweight and obese Mexican women
Source: BMC Public Health. 2015 Oct 7;15:1031. doi: 10.1186/s12889-015-2367-0 (PMC4597614; doi:10.1186/s12889-015-2367-0)
Supplement: Additional file 1: — Beverage Diary Register. The 7-day diary instrument used in the study, translated into English (PDF 102 kb) [file 12889_2015_2367_MOESM1_ESM.pdf]

**Additional file 1. Comparing a 7-days diary vs. 24 hr-recall for estimating fluid consumption in overweight and obese Mexican women.**

Beverage Diary Register

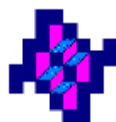

ID | | | | | | |

NAME \_\_\_\_\_

Beverage Diary Register

STAGE \_\_\_\_\_

M T W T F S S

DATE \_\_\_\_/\_\_\_\_/\_\_\_\_

|                                             | BEVERAGE NAME           | CODE<br>(INTERVIEWER<br>ONLY)    | PORTION SIZE            | TOTAL AMOUNT            | COMERCIAL BRAND         |
|---------------------------------------------|-------------------------|----------------------------------|-------------------------|-------------------------|-------------------------|
| AT WAKING UP<br>/ BEFORE<br>BREAKFAST       | _____<br>_____<br>_____ | _____<br>_____<br>_____<br>_____ | _____<br>_____<br>_____ | _____<br>_____<br>_____ | _____<br>_____<br>_____ |
| DURING<br>BREAKFAST                         | _____<br>_____<br>_____ | _____<br>_____<br>_____<br>_____ | _____<br>_____<br>_____ | _____<br>_____<br>_____ | _____<br>_____<br>_____ |
| BEFORE<br>LUNCH                             | _____<br>_____<br>_____ | _____<br>_____<br>_____<br>_____ | _____<br>_____<br>_____ | _____<br>_____<br>_____ | _____<br>_____<br>_____ |
| DURING<br>LUNCH                             | _____<br>_____<br>_____ | _____<br>_____<br>_____<br>_____ | _____<br>_____<br>_____ | _____<br>_____<br>_____ | _____<br>_____<br>_____ |
| DURING THE<br>EVENING /<br>BEFORE<br>DINNER | _____<br>_____<br>_____ | _____<br>_____<br>_____<br>_____ | _____<br>_____<br>_____ | _____<br>_____<br>_____ | _____<br>_____<br>_____ |
| DURING<br>DINNER                            | _____<br>_____<br>_____ | _____<br>_____<br>_____<br>_____ | _____<br>_____<br>_____ | _____<br>_____<br>_____ | _____<br>_____<br>_____ |
| BEFORE<br>GOING TO BED                      | _____<br>_____<br>_____ | _____<br>_____<br>_____<br>_____ | _____<br>_____<br>_____ | _____<br>_____<br>_____ | _____<br>_____<br>_____ |
