# Supplementary material for: Comparing a 7-day diary vs. 24 h-recall for estimating fluid consumption in overweight and obese Mexican women
Source: Springer Nature journal article supplement (doi:10.1186/s12889-015-2367-0), 2015-10-07
Supplement: MOESM2 [file 9750572]

**Additional file 2. Comparing a 7-days diary vs. 24 hr-recall for estimating fluid consumption in overweight and obese Mexican women.**

**Total fluid intake (mL/d and kcal/d) cross-classification and rank correlation by tertiles ( $n = 190$ )**

|                                                      | 24-hr recall tertile<br>(mL/d) |                  |                  |       |
|------------------------------------------------------|--------------------------------|------------------|------------------|-------|
| 7-day diary tertile<br>(mL/d)                        | 1<br>(477–1917)                | 2<br>(1921–2502) | 3<br>(2503–3965) | Total |
| 1 (643–1910)                                         | 47                             | 16               | 1                | 64    |
| 2 (1938–2580)                                        | 10                             | 35               | 18               | 63    |
| 3 (2586–5078)                                        | 7                              | 12               | 44               | 63    |
| <b>Total</b>                                         | 64                             | 63               | 63               | 190   |
| Spearman rank correlation, $r = 0.654$ , $p < 0.001$ |                                |                  |                  |       |

|                                                      | 24-hr recall tertile<br>(kcal/d) |                 |                  |       |
|------------------------------------------------------|----------------------------------|-----------------|------------------|-------|
| 7-day diary tertile<br>(kcal/d)                      | 1<br>(0–840)                     | 2<br>(846–1449) | 3<br>(1455–5300) | Total |
| 1 (0–900)                                            | 47                               | 14              | 3                | 64    |
| 2 (895–1624)                                         | 13                               | 32              | 18               | 63    |
| 3 (1633–4346)                                        | 4                                | 17              | 42               | 63    |
| <b>Total</b>                                         | 64                               | 63              | 63               | 190   |
| Spearman rank correlation, $r = 0.646$ , $p < 0.001$ |                                  |                 |                  |       |
