# Supplementary material for: Comparing a 7-day diary vs. 24 h-recall for estimating fluid consumption in overweight and obese Mexican women
Source: Springer Nature journal article supplement (doi:10.1186/s12889-015-2367-0), 2015-10-07
Supplement: MOESM3 [file 9750572]

**Additional file 3. Comparing a 7-days diary vs. 24 hr-recall for estimating fluid consumption in overweight and obese Mexican women.**

**Spearman rank correlation (RC) by type of beverage (mL/d and kcal/d)**

| Type of beverage                                                          | mL/d  |                 | Kcal/d |                 |
|---------------------------------------------------------------------------|-------|-----------------|--------|-----------------|
|                                                                           | RC    | <i>p</i> -value | RC     | <i>p</i> -value |
| Sugar-sweetened beverages (SSB) <sup>1</sup> ( <i>n</i> = 171)            | 0.693 | <0.001          | 0.614  | <0.001          |
| Fruit juices <sup>2</sup> ( <i>n</i> = 26)                                | 0.297 | 0.140           | 0.297  | 0.140           |
| Milk and milk products without added sugars <sup>3</sup> ( <i>n</i> = 91) | 0.295 | 0.004           | 0.377  | <0.001          |
| Milk and milk products with added sugars <sup>4</sup> ( <i>n</i> = 83)    | 0.344 | 0.001           | 0.345  | 0.001           |
| Alcohol beverages <sup>5</sup> ( <i>n</i> = 24)                           | 0.625 | 0.001           | 0.687  | <0.001          |
| Noncaloric beverages <sup>6</sup> ( <i>n</i> = 66)                        | 0.545 | <0.001          | 0.539  | <0.001          |
| Water ( <i>n</i> = 187)                                                   | 0.776 | <0.001          | —      | —               |

<sup>1</sup> Sugar sweetened beverages: canned or commercial juices, soft drinks, *atole* (beverage with sugar, without milk), artificial fruit beverages with sugar, sugar-sweetened traditional beverages, such as lemonade, hibiscus water, and rice water [*aguas frescas*], coffee or tea with sugar.

<sup>2</sup> Fruit juices: natural fruit and vegetables juices without sugar added.

<sup>3</sup> Milk and milk products without added sugar: milk and drinkable yogurt (plain or light), *atole* with milk, without sugar added, fermented beverage without sugar, coffee or tea with milk or cream substitute.

<sup>4</sup> Milk and milk products with added sugar: sweetened milk, yogurt or fermented beverages, *atole* with milk and sugar, milk with chocolate, milkshake, coffee or tea with milk and sugar added.

<sup>5</sup> Alcohol beverages: Beer, alcoholic egg nog, rum, wine, vodka, whisky, with or without other ingredients.

<sup>6</sup> Unsweetened beverages: sugar-free carbonated beverages, *atole* without sugar nor milk, mineral water, coffee and tea without sugar, beverages with noncaloric sweetener.
